# Supplementary material for: Uncovering the Informal Learning of Patient Safety in Undergraduate Clinical Rotations: A Qualitative Study of Patient Safety Specialists' Perspectives
Source: Research Square preprint supplement (doi:10.21203/rs.3.rs-8480843/v1), 2026-02-10
Supplement: Supplementary file 1 [file 194a1d98f5800c9790de8cf1.docx]

**Supplementary file 1**

**Question 1**

During undergraduate clinical rotations, what kinds of actions or behaviors related to patient safety do medical students learn by observing or participating in routine clinical practice?

Please list as many concrete examples as possible based on your experience, including actions taken by health professions during diagnosis, treatment, or daily care that contribute to patient safety.

**Question 2**

What kinds of support or initiatives could patient safety units provide to enhance or promote medical students’ learning about patient safety in clinical settings?

Please describe specific measures or approaches that could help students recognize, experience, or reflect on patient safety–related practices during their clinical rotations.
